# Supplementary material
Source: HighWire-hosted journal article supplement (https://www.cmajopen.ca/content/suppl/2020/05/15/8.2.E370)

1  
2  
3 **Risk Stratification of Patients with Non-alcoholic Fatty Liver Disease in**  
4  
5 **Primary Care**  
6  
7  
8  
9

10 **Short title:** Risk Stratifying Non-alcoholic Fatty Liver Disease Patients.  
11  
12  
13

14 Abdel Aziz Shaheen MBBCh MPH<sup>1</sup>, Kiarash Riazi<sup>1</sup> MBBCh, Alexandra Medellin  
15 MD<sup>1,2</sup>, Deepak Bhayana MD<sup>1,2</sup>, Gilaad G. Kaplan MD MPH<sup>1</sup>, Roy Park MD<sup>2</sup>, Wendy  
16  
17 Schaufert<sup>3</sup>, Kelly W. Burak MD MSc<sup>1</sup>, Robert P. Myers MD MSc<sup>4</sup>, Monica Sargious  
18  
19 MD<sup>5</sup>, and Mark G. Swain MD MSc<sup>1</sup>  
20  
21  
22  
23  
24  
25

26 <sup>1</sup>Department of Medicine, Division of Gastroenterology and Hepatology, University of  
27  
28 Calgary, Calgary, Alberta, Canada; <sup>2</sup>EFW Radiology group, Calgary, Alberta,  
29  
30 Canada; <sup>3</sup>Alberta Health Services, Calgary, Alberta, Canada; <sup>4</sup>Gilead Sciences, Inc,  
31  
32 Foster City, California, USA; <sup>5</sup>Community Primary Care, Alberta Health Services,  
33  
34 Calgary, Alberta, Canada.  
35  
36  
37  
38  
39

40 **Correspondence**  
41

42 Abdel Aziz Shaheen, MBBCh, MPH, FRCPC  
43  
44 Assistant Professor of Medicine, Department of Medicine and Community Health  
45  
46 Sciences, Division of Gastroenterology and Hepatology, O'Brian Institute for Public  
47  
48 Health, Cumming School of Medicine, University of Calgary  
49  
50 3280 Hospital Drive NW, Room 6D25  
51  
52 Calgary Alberta, T2N 4Z6  
53  
54 Tel: 403-592-5034  
55  
56 Fax: 403-592-5090  
57

58 **Disclosures:** The authors disclose no conflicts relevant to this manuscript  
59  
60

1  
2  
3 **Grant support:** Supported by Gilead Sciences Inc., Investigator Sponsored  
4  
5 Research (ISR) Program.  
6  
7  
8  
9

10 **Author Contributions:** Study concept and design: AAS, AM, RPM, WS, MS, MGS.  
11  
12 Data acquisition: AAS, AM, DB, RP, MGS. Statistical Analysis: AAS, KR, MGS.  
13  
14 Interpretation of the data: AAS, KR, AM, DB, GGK, KWB, MGS. Drafting of the  
15  
16 manuscript: AAS, AM, DB, KWB, GGK, MGS. Critical revision of the manuscript for  
17  
18 intellectual content: All authors. Final approval of the manuscript: All authors.  
19  
20  
21  
22  
23  
24  
25  
26  
27  
28  
29  
30  
31  
32  
33  
34  
35  
36  
37  
38  
39  
40  
41  
42  
43  
44  
45  
46  
47  
48  
49  
50  
51  
52  
53  
54  
55  
56  
57  
58  
59  
60

Confidential

## Abstract

**Background:** Nonalcoholic fatty liver disease (NAFLD) is a growing Canadian epidemic. However, identification of NAFLD patients with advanced liver fibrosis in primary care remains an unmet need. To address this we developed a shear wave elastography (SWE)-based case identification pathway in primary care to facilitate more appropriate and timely care of NAFLD patients at risk of advanced fibrosis.

**Methods:** A multi-disciplinary NAFLD clinical care pathway was co-developed by hepatologists, radiologists, and primary care physicians (PCP) to provide access to SWE-based screening of patients with NAFLD risk factors in primary care. NAFLD patients with liver stiffness by SWE  $\geq 8.0$  kPa (or inconclusive assessment) were referred to hepatology. A serum liver fibrosis score, FIB-4, was also measured and demographic, clinical, and laboratory characteristics of study groups compared.

**Results:** Between March- October 2018, 2,081 suspected NAFLD patients were evaluated. NAFLD was confirmed by ultrasound in 94%. Elevated liver biochemistry (52%) and obesity (60%) were prevalent in our cohort. The majority of NAFLD patients (91.5%) had SWE  $< 8.0$  kPa and were not referred to hepatology, whereas 3.4% had a SWE  $\geq 8.0$  kPa and 5.1% had an inconclusive SWE (ie. total 8.5%) and were referred to hepatology. Using a FIB-4 score cut-off of 1.30 would have led to hepatology referral of 32% of patients.

**Conclusions:** Implementation of a primary care-accessible SWE pathway for NAFLD patients facilitated fibrosis risk-stratification and reduced hepatology referrals. Using serum fibrosis score FIB-4 alone would lead to higher referral rates of NAFLD patients.

## INTRODUCTION

Nonalcoholic fatty liver disease (NAFLD) is common in patients with diabetes, obesity, dyslipidemia, and metabolic syndrome and has become the leading cause of liver disease in North America.<sup>1,2</sup> Although awareness of NAFLD among primary care physicians is increasing, identifying high-risk NAFLD patients in primary care remains challenging<sup>3-5</sup> and resource-intensive.<sup>6</sup> Furthermore, a strategy to help primary care physicians better triage NAFLD patients for specialist care based on liver fibrosis is lacking.<sup>7</sup> In recent studies, primary care physicians found abnormal liver tests in 18-30% of patients, with 25-29% having NAFLD.<sup>8,9</sup> However, identifying patients with advanced fibrosis who may benefit from hepatology referral, amongst NAFLD population, remains a significant challenge.<sup>6</sup>

Non-invasive serum liver fibrosis scores, such as fibrosis-4 variable index (FIB-4), as well as ultrasound-based modalities including transient elastography (TE; Fibroscan<sup>®</sup>) and shear wave elastography (SWE) have been used to assess liver fibrosis severity in NAFLD patients.<sup>10,11</sup> Liver stiffness measurement (LSM) by TE and SWE are valid and reliable measures of liver fibrosis.<sup>12,13</sup> However, applying these tools in the primary care setting has not been explored.<sup>11,13,14</sup>

SWE technology can be applied to standard ultrasound machines and could potentially lead to assessment of more patients compared to TE (available mainly in tertiary care centers).<sup>15</sup> Moreover, SWE enables radiologists to directly assess patients for evidence of cirrhosis complications.<sup>16</sup>

Therefore, our primary objective was to implement a SWE-driven pathway to facilitate risk stratification of NAFLD patients within primary care, and evaluate whether SWE assessment could reduce low fibrosis risk NAFLD patient referrals to hepatology.

## **METHODS**

### **Cohort development**

The Calgary NAFLD clinical care pathway (CN-CCP) was developed by hepatologists, radiology, and primary care leadership in Calgary, Canada (population ~1.4 million). The CN-CCP was accessible to primary care physicians for patients with NAFLD risk factors or conditions including: diabetes, increased body mass index (BMI), dyslipidemia or metabolic syndrome, previous imaging evidence of fatty liver, and elevated liver biochemistry. Patients with other chronic liver diseases, including heavy alcohol consumption (> 2 standard alcohol drinks per day for men, >1 for women), viral hepatitis B or C, and immune-mediated liver disorders were excluded.

Patients with probable NAFLD, and no exclusion criteria, were referred by primary care to community-based radiology providers for SWE assessment. Based on SWE (threshold 8.0 kPa), patients were stratified as “at risk” or “low risk” for advanced fibrosis. “At risk” patients (SWE  $\geq$  8.0 kPa, or inconclusive SWE assessment) were recommended for hepatology referral through a single citywide central referral access point. Patients at “low risk” were managed within primary care using a standardized management plan that included lifestyle modifications. The Calgary NAFLD CCP is appended (Appendix 1).

### **NAFLD Pathway Evaluation**

An evaluation period for the CN-CCP occurred October 2016 - February 2018, to ensure high-quality implementation.

### **Study Duration**

Patients with a confirmed NAFLD diagnosis during SWE assessment (between March - November 2018) were included in our prospective cohort.

## Data Source

The CN-CCP database was established, including all adult Calgary residents with suspected NAFLD referred by primary care physicians for SWE. The database contains patient demographics and SWE characteristics, comorbidities, laboratory data (complete blood count, lipid profile [triglycerides, cholesterol, high density lipoprotein (HDL), and low density lipoprotein (LDL)], hemoglobin A1c (HbA1c), international normalized ratio (INR), liver biochemistry (alanine aminotransferase (ALT), aspartate aminotransferase (AST), alkaline phosphatase (ALP), albumin, and gamma glutamyl transpeptidase (GGT), creatinine), medications for diabetes, dyslipidemia, and hypertension, and SWE findings (assessment date, reliable study [yes/no], median and interquartile range of speed based on 10 measurements [m/s], median elasticity [kPa], portal vein diameter, liver echogenicity and attenuation, liver contour and echotexture).

## Covariates

We included the following variables from the CN-CCP database: age; sex; body mass index (BMI; weight in kg/ height in m<sup>2</sup>); type 2 diabetes mellitus (T2DM) defined as: Hemoglobin A1c > 6.4%, a diagnosis code of T2DM by a physician, or patients using T2DM treatment; impaired fasting glucose (IFG) defined as HbA1c between 5.7-6.4%; hypertension defined by a physician diagnosis code or a drug treatment for hypertension; laboratory investigations.

Laboratory data were obtained at baseline (within 3 months of SWE). Patients had elevated liver enzymes if ALT values were  $\geq$  ULN (ALT: male  $\geq$  30 U/L, female  $\geq$  25 U/L).<sup>17</sup> As AST was often not routinely ordered by primary care physicians, we described the patient characteristics of those with available AST and FIB-4 compared to patients with missing values (AST is required for FIB-4 calculation).

### **NAFLD case confirmation**

All patients evaluated in the NAFLD CCP received an abdominal ultrasound and SWE. Patients with homogenous liver echotexture, normal echogenicity/ contour, and no signal attenuation were identified as not having fatty liver. Patients with liver steatosis were considered to have NAFLD.<sup>15,16</sup> Patients with failed SWE (n=3 patients) were excluded.

### **Liver stiffness assessment**

SWE is a real-time ultrasound-based technique widely used to assess liver stiffness (ie. fibrosis) using an acoustic radiation force-induced (ARFI) pulse through tissue to create shear waves.<sup>18,15</sup> SWE was performed using a 2D Canon Aplio i800 (Otawara-shi, Tochigi, Japan) ultrasound system. A standard abdominal ultrasound examination (fasting patient) was performed by a trained technologist (completed  $\geq 100$  supervised SWE exams) or a subspecialty body radiologist with SWE experience.<sup>16,18</sup> An inconclusive SWE reflected the inability to obtain a technically reliable shear wave (using IQR/median  $\leq 15\%$  for m/s or  $\leq 30\%$  for kPa).<sup>16</sup>

### **Statistical analyses**

Patient characteristics according to SWE results were described. Chi squared ( $X^2$ ) test and Wilcoxon rank-sum test or Kruskal-Wallis test were applied to study demographic, laboratory, and clinical differences between study groups at baseline according to LSM values. Logistic regression models identified independent predictors of SWE  $\geq 8.0$  kPa, or inconclusive SWE measurements. Logistic regression models were adjusted for age, sex, BMI, ALT at baseline, and comorbidities. All regression model estimates were reported as adjusted odds ratio (aOR) with accompanying 95% confidence intervals (CIs). Further analyses identified possible differences between patients with complete laboratory

1  
2  
3 investigations (for calculating FIB-4) and those lacking required tests. A published  
4  
5 cut-off value of 1.30 for FIB-4 was used (cut-off has demonstrated high negative  
6  
7 predictive value (NPV) for advanced fibrosis >90%).<sup>11</sup> All analyses were performed  
8  
9 using Stata IC (version 15.1, Texas, USA).  
10  
11  
12  
13

## 14 **RESULTS**

### 15 **Patient characteristics**

16  
17 2,081 suspected NAFLD patients were evaluated via the CN-CCP between March -  
18  
19 November 2018 (Figure 1). NAFLD was diagnosed by ultrasound in 94.1% of  
20  
21 patients (n=1,958). Diagnosis of NAFLD varied by BMI (97.1% for BMI  $\geq$  30 kg/m<sup>2</sup>;  
22  
23 92.3% for BMI 25–30 kg/m<sup>2</sup>,  $P<0.001$ ). In our cohort, slightly more NAFLD patients  
24  
25 were female (53.7%, n=1,052), with a median age of 55 years (IQR: 45–63).  
26  
27  
28  
29

30 Baseline clinical and laboratory investigations are presented in Table 1. Median  
31  
32 SWE was 4.4 kPa (IQR: 3.7–5.5 kPa), while median FIB-4 score was 0.99 (IQR:  
33  
34 0.69–1.48).  
35  
36  
37

### 38 **NAFLD patient classification by SWE in primary care**

39  
40 1,791 NAFLD patients (91.5%) had SWE < 8.0 kPa and were not referred to  
41  
42 hepatology. However, 8.5% (n=167) NAFLD patients had SWE  $\geq$  8.0 kPa (3.4%) or  
43  
44 inconclusive results (5.1%), and hepatology referral was recommended. Compared  
45  
46 to non-referred patients, referred patients (SWE  $\geq$  8.0 kPa or inconclusive result)  
47  
48 were older (median age 61, 57 vs. 54 years,  $P<0.01$ ), had a higher BMI (median  
49  
50 37.2, 40.6 vs. 31.6,  $P<0.01$ ), and were more likely to have IFG/DM (74.6%, 74.0%  
51  
52 vs. 61.2%,  $P<0.01$ ). NAFLD patients with SWE  $\geq$  8.0 kPa or inconclusive result had  
53  
54 similar ALT and AST levels as those with SWE < 8.0 kPa. However, patients with  
55  
56 SWE  $\geq$  8.0 kPa or inconclusive result had lower albumin levels (median 37, 37 vs.  
57  
58  
59  
60



1  
2  
3 39,  $P<0.01$ ), higher GGT levels (median 87, 48 vs. 45,  $P<0.01$ ), lower platelet count  
4  
5 (median 214, 234 vs. 252,  $P<0.01$ ), and higher FIB-4 scores (1.71, 1.19 vs. 0.96,  
6  
7  $P<0.01$ ), compared to patients with SWE  $< 8.0$  kPa (Table 1).

### 8 9 10 **Cohort stratification based on different cut-offs of SWE**

11  
12 Using SWE cut-off points between 6.0 - 9.0 kPa led to different rates for  
13  
14 recommended hepatology referral. Specifically, 67 patients (3.4%) had a SWE result  
15  
16  $\geq 8.0$  kPa, 106 (5.4%) had a SWE result  $\geq 7.0$  kPa and 44 (2.3%) had SWE  $\geq 9.0$   
17  
18 kPa (Supplementary Table 1).

### 19 20 21 **Using the FIB-4 score for NAFLD cohort risk stratification**

22  
23 FIB-4 was modelled as a potential index test to classify NAFLD patients for being at  
24  
25 risk for advanced fibrosis. Patient characteristics did not differ between patients with  
26  
27 available FIB-4 scores (63.9%,  $n=1,251$ ) and those without (Supplementary Table 2).  
28  
29 Applying a FIB-4 cut-off of  $<1.30$  as an index test would have classified 68.4%  
30  
31 ( $n=855$ ) of NAFLD patients as low-risk for advanced liver fibrosis but would have led  
32  
33 to hepatology referral in 31.7% ( $n=396$ ). However, in hepatology-referred patients  
34  
35 with a FIB-4 cut-off  $> 1.30$ , only 34 (8.6%) would have SWE  $\geq 8.0$  kPa. Importantly,  
36  
37 21 patients (2.5%) had SWE  $\geq 8.0$  kPa within the FIB-4  $<1.30$  cohort (Figure 2).  
38  
39 Therefore, agreement was observed in 69.4% of patients ( $n=868/1,250$ ). Using a  
40  
41 higher FIB-4 cut-off such as 2.24 would lead to referral of 10.2% of our cohort.  
42  
43 However, only 29.1% (16/55) of NAFLD patients with SWE $>8.0$  kPa would be  
44  
45 referred for assessment.  
46  
47  
48  
49  
50

### 51 52 **Which patient characteristics predict the need for hepatology referral?**

53  
54 In adjusted models for patient characteristics (including age, sex, obesity, diabetes,  
55  
56 glucose intolerance, hypertension, and having either elevated ALT or AST at  
57  
58 baseline), independent predictors of SWE  $\geq 8.0$  kPa were evaluated (Table 2).  
59  
60

1  
2  
3 Obesity (aOR 1.93: 1.01–3.75), T2DM (aOR 2.22: 1.13–4.36) and hypertension  
4  
5 (aOR 2.18: 1.19–3.98) were the only independent predictors for a SWE  $\geq$  8.0 kPa.  
6  
7 Independent predictors of need for hepatology referral (i.e., SWE  $\geq$  8.0 kPa or  
8  
9 inconclusive results) were similar to our previous model. Specifically, obese patients  
10  
11 had a three-fold higher risk of needing a hepatology referral (aOR 2.94: 1.85–4.69),  
12  
13 while patients with T2DM and hypertension had two-fold higher risk (aOR 2.33:  
14  
15 1.50–3.63; and 2.38: 1.62–3.50, respectively) (Table 2).  
16  
17  
18  
19  
20  
21

## 22 **DISCUSSION**

23  
24 We report findings from the largest North American primary care-based NAFLD  
25  
26 patient cohort assessed for elevated LSM using a unique, Canadian primary care-  
27  
28 based NAFLD clinical pathway implementing SWE to evaluate liver fibrosis risk. We  
29  
30 used this pathway to differentiate those patients with low risk of advanced fibrosis,  
31  
32 who do not require hepatology referral, from those who are “at risk” and could benefit  
33  
34 from hepatology referral. 3.4% of NAFLD patients in our cohort had SWE  $\geq$  8.0 kPa,  
35  
36 suggesting they were at risk for advanced liver fibrosis, and 5.1% had inconclusive  
37  
38 SWE. The higher rate of inconclusive SWE was related mainly to morbid obesity  
39  
40 (BMI  $\geq$  40). Therefore, the CN-CCP identified 8.5% of our total NAFLD cohort for  
41  
42 specialist referral. Few studies have reported the prevalence of NAFLD-related  
43  
44 elevated LSM in the general population.<sup>19-22</sup> Caballeria et al. found 5.8% of a  
45  
46 Spanish population had LSM by TE  $>$  8.0 kPa, with the majority of patients having  
47  
48 NAFLD. In contrast, Koehler et al. reported a prevalence of 8.4% for the same LSM  
49  
50 cut-off in a Dutch population.<sup>19,21</sup> However, all of these studies used TE measured  
51  
52 LSM for estimating liver fibrosis.  
53  
54  
55  
56  
57  
58  
59  
60

1  
2  
3 Both SWE and TE (Fibroscan®) are ultrasound modalities commonly used to  
4 assess liver fibrosis.<sup>6</sup> These techniques are well validated in NAFLD patients.<sup>12,23-25</sup>  
5  
6 A recent meta-analysis by Hermann et. al. showed that in 156 NAFLD patients, using  
7 liver biopsy as gold standard, performance of SWE was equivalent to TE, with a  
8 small gain in AUROC for all stages of fibrosis.<sup>24</sup> We used a SWE cut-off of 8.0 kPa,  
9 as this cut-off has previously shown excellent performance for *ruling out* advanced  
10 liver fibrosis (sensitivity of 91% and negative predictive value of >95%).<sup>11,12,24</sup>  
11  
12 Therefore, we used this SWE cut-off to identify NAFLD patients at “low risk” for  
13 advanced liver fibrosis; allowing the pathway to direct further focused workup on at  
14 risk patients, recognizing that a SWE cut-off of > 8.0 kPa alone has a PPV >75% for  
15 identifying NAFLD patients with advanced fibrosis (which may be lower in a low  
16 prevalence community setting).<sup>11</sup>

17  
18 In our cohort, obesity, T2DM, and hypertension, but not elevated liver  
19 enzymes, were the main independent predictors for SWE  $\geq$  8.0 kPa. These findings  
20 suggest that risk stratification of NAFLD patients for advanced liver fibrosis may  
21 benefit from targeting patients with these comorbidities.

22  
23 31.7% of our patients had a FIB-4 score >1.30, previously shown to have a  
24 NPV >90 for ruling out advanced fibrosis.<sup>11</sup> Choosing higher cut-off values for FIB-4  
25 would will lead to a higher PPV, but worse NPV.<sup>11,26,27</sup> Similar to our study,  
26 implementing FIB-4 scores in a British primary care setting found that 30% of NAFLD  
27 patients had a FIB-4 score >1.30.<sup>28</sup> While not the focus of this paper, a cost utility  
28 analysis could be conducted comparing SWE results to serum noninvasive fibrosis  
29 scores to risk stratify NAFLD patients.

30  
31 There are multiple strengths to our study. We outline results from  
32 implementation of a novel primary care-based SWE-driven CCP to evaluate NAFLD  
33  
34  
35  
36  
37  
38  
39  
40  
41  
42  
43  
44  
45  
46  
47  
48  
49  
50  
51  
52  
53  
54  
55  
56  
57  
58  
59  
60

1  
2  
3 patients. Our pathway was widely accepted by primary care physicians due to its'  
4 simple algorithm and accessibility. Importantly, SWE technology is readily applied to  
5 most commonly used ultrasound machines. Our SWE-driven NAFLD pathway  
6 decreased primary care referral of at risk NAFLD patients to hepatology by >90%  
7 and enriched the referred population for advanced liver fibrosis. This type of NAFLD  
8 patient triaging within primary care, prior to specialist referral, will be critical for  
9 dealing with the huge and growing societal NAFLD patient burden, allowing  
10 streamlined specialist referral for patients at risk for advanced liver fibrosis who may  
11 benefit from aggressive intervention targeted at their liver disease. Importantly, our  
12 cohort is more representative of high-risk NAFLD patients in the general community,  
13 compared to previous studies focused on patient cohorts after tertiary care referral.  
14 Furthermore, our study provides essential data to answer uncertainties on  
15 performance of diagnostic tools for assessing NAFLD. Recent guidelines urged that  
16 studies like ours be undertaken to evaluate the feasibility of routine evaluation for  
17 NAFLD in primary care,<sup>6,29</sup> especially with anticipated availability of pharmacological  
18 treatment options for NAFLD patients with advanced fibrosis in the near future.

19  
20  
21  
22  
23  
24  
25  
26  
27  
28  
29  
30  
31  
32  
33  
34  
35  
36  
37  
38  
39  
40 Our study has some limitations. To allow for easier implementation of the  
41 NAFLD pathway, we provided guidance to primary care physicians without strict  
42 criteria or incentives to assess only probable NAFLD patients. Therefore, most of our  
43 T2DM cohort had NAFLD, since primary care physicians often referred T2DM  
44 patients for SWE who had previous incidental findings of fatty liver. Similarly, we  
45 could calculate FIB-4 scores on ~ 2/3 of our cohort, as primary care physicians in  
46 Calgary historically have been discouraged from routinely ordering AST. However,  
47 this did not affect our results, as there were no significant differences between  
48 NAFLD patients with available FIB-4 scores and those without.  
49  
50  
51  
52  
53  
54  
55  
56  
57  
58  
59  
60

1  
2  
3 In summary, we demonstrate the feasibility of implementing a primary care-  
4 based NAFLD clinical care pathway using SWE that facilitates streamlining of  
5 specialist referral of NAFLD patients at risk of having advanced liver fibrosis. In our  
6 cohort, approximately 8.5% of NAFLD patients had elevated LSM (or inconclusive  
7 results), and were referred to hepatology. Using a noninvasive score like FIB-4  
8 would lead to higher specialist referral rates of NAFLD patients with low risk for  
9 advanced liver fibrosis. Our findings are important to improve clinical care  
10 approaches for liver disease evaluation in NAFLD patients, and for directing NAFLD  
11 patient care based on fibrosis risk.  
12  
13  
14  
15  
16  
17  
18  
19  
20  
21  
22  
23  
24  
25  
26  
27  
28  
29  
30  
31  
32  
33  
34  
35  
36  
37  
38  
39  
40  
41  
42  
43  
44  
45  
46  
47  
48  
49  
50  
51  
52  
53  
54  
55  
56  
57  
58  
59  
60

Confidential

## REFERENCES

1. Younossi ZM, Koenig AB, Abdelatif D, Fazel Y, Henry L, Wymer M. Global epidemiology of nonalcoholic fatty liver disease-Meta-analytic assessment of prevalence, incidence, and outcomes. *Hepatology*. 2016;64:73-84.
2. Ong JP, Younossi ZM. Epidemiology and natural history of NAFLD and NASH. *Clin Liver Dis*. 2007;11:1-16, vii.
3. Tapper EB, Saini SD, Sengupta N. Extensive testing or focused testing of patients with elevated liver enzymes. *J Hepatol*. 2017;66:313-9.
4. Tapper EB, Loomba R. NAFLD, Metabolic Syndrome, and the Fight That Will Define Clinical Practice for a Generation of Hepatologists. *Hepatology*. 2017.
5. Younossi ZM, Blissett D, Blissett R, et al. The economic and clinical burden of nonalcoholic fatty liver disease in the United States and Europe. *Hepatology*. 2016;64:1577-86.
6. Chalasani N, Younossi Z, Lavine JE, et al. The diagnosis and management of nonalcoholic fatty liver disease: Practice guidance from the American Association for the Study of Liver Diseases. *Hepatology*. 2018;67:328-57.
7. Polanco-Briceno S, Glass D, Stuntz M, Caze A. Awareness of nonalcoholic steatohepatitis and associated practice patterns of primary care physicians and specialists. *BMC Res Notes*. 2016;9:157.
8. Chatwin T. Diagnosing liver disease in asymptomatic patients. *JAAPA*. 2001;14:39-47.
9. Donnan PT, McLernon D, Dillon JF, et al. Development of a decision support tool for primary care management of patients with abnormal liver function tests without clinically apparent liver disease: a record-linkage population cohort study and decision analysis (ALFIE). *Health Technol Assess*. 2009;13:iii-iv, ix-xi, 1-134.
10. Bedossa P, Patel K. Biopsy and Noninvasive Methods to Assess Progression of Nonalcoholic Fatty Liver Disease. *Gastroenterology*. 2016;150:1811-22 e4.
11. Xiao G, Zhu S, Xiao X, Yan L, Yang J, Wu G. Comparison of laboratory tests, ultrasound, or magnetic resonance elastography to detect fibrosis in patients with nonalcoholic fatty liver disease: A meta-analysis. *Hepatology*. 2017;66:1486-501.
12. Cassinotto C, Boursier J, de Ledinghen V, et al. Liver stiffness in nonalcoholic fatty liver disease: A comparison of supersonic shear imaging, FibroScan, and ARFI with liver biopsy. *Hepatology*. 2016;63:1817-27.
13. Kaswala DH, Lai M, Afdhal NH. Fibrosis Assessment in Nonalcoholic Fatty Liver Disease (NAFLD) in 2016. *Dig Dis Sci*. 2016;61:1356-64.
14. Musso G, Gambino R, Cassader M, Pagano G. Meta-analysis: natural history of non-alcoholic fatty liver disease (NAFLD) and diagnostic accuracy of non-invasive tests for liver disease severity. *Ann Med*. 2011;43:617-49.
15. Sigrist RMS, Liau J, Kaffas AE, Chammass MC, Willmann JK. Ultrasound Elastography: Review of Techniques and Clinical Applications. *Theranostics*. 2017;7:1303-29.
16. Dietrich CF, Bamber J, Berzigotti A, et al. EFSUMB Guidelines and Recommendations on the Clinical Use of Liver Ultrasound Elastography, Update 2017 (Long Version). *Ultraschall Med*. 2017;38:e16-e47.
17. Kim HC, Nam CM, Jee SH, Han KH, Oh DK, Suh I. Normal serum aminotransferase concentration and risk of mortality from liver diseases: prospective cohort study. *BMJ*. 2004;328:983.

18. Barr RG, Ferraioli G, Palmeri ML, et al. Elastography Assessment of Liver Fibrosis: Society of Radiologists in Ultrasound Consensus Conference Statement. *Ultrasound Q*. 2016;32:94-107.
19. Koehler EM, Plompen EP, Schouten JN, et al. Presence of diabetes mellitus and steatosis is associated with liver stiffness in a general population: The Rotterdam study. *Hepatology*. 2016;63:138-47.
20. Mahady SE, Macaskill P, Craig JC, et al. Diagnostic Accuracy of Noninvasive Fibrosis Scores in a Population of Individuals With a Low Prevalence of Fibrosis. *Clin Gastroenterol Hepatol*. 2017;15:1453-60 e1.
21. Caballeria L, Pera G, Arteaga I, et al. High Prevalence of Liver Fibrosis Among European Adults With Unknown Liver Disease: A Population-Based Study. *Clin Gastroenterol Hepatol*. 2018;16:1138-45 e5.
22. Petta S, Di Marco V, Pipitone RM, et al. Prevalence and severity of nonalcoholic fatty liver disease by transient elastography: Genetic and metabolic risk factors in a general population. *Liver Int*. 2018;38:2060-8.
23. Cassinotto C, Lapuyade B, Mouries A, et al. Non-invasive assessment of liver fibrosis with impulse elastography: comparison of Supersonic Shear Imaging with ARFI and FibroScan(R). *J Hepatol*. 2014;61:550-7.
24. Herrmann E, de Ledinghen V, Cassinotto C, et al. Assessment of biopsy-proven liver fibrosis by two-dimensional shear wave elastography: An individual patient data-based meta-analysis. *Hepatology*. 2018;67:260-72.
25. Yoneda M, Thomas E, Sclair SN, Grant TT, Schiff ER. Supersonic Shear Imaging and Transient Elastography With the XL Probe Accurately Detect Fibrosis in Overweight or Obese Patients With Chronic Liver Disease. *Clin Gastroenterol Hepatol*. 2015;13:1502-9 e5.
26. Chalasani N, Younossi Z, Lavine JE, et al. The diagnosis and management of non-alcoholic fatty liver disease: practice guideline by the American Gastroenterological Association, American Association for the Study of Liver Diseases, and American College of Gastroenterology. *Gastroenterology*. 2012;142:1592-609.
27. Castera L, Friedrich-Rust M, Loomba R. Noninvasive Assessment of Liver Disease in Patients With Nonalcoholic Fatty Liver Disease. *Gastroenterology*. 2019;156:1264-81 e4.
28. Srivastava A, Gailer R, Tanwar S, et al. Prospective evaluation of a primary care referral pathway for patients with non-alcoholic fatty liver disease. *J Hepatol*. 2019;71:371-8.
29. Bugianesi E. EASL-EASD-EASO Clinical Practice Guidelines for the management of non-alcoholic fatty liver disease: disease mongering or call to action? *Diabetologia*. 2016;59:1145-7.

1  
2  
3 **Tables legends:**  
4  
5

6 **Table 1:** NAFLD patient characteristics according to SWE  $\geq$  8 kPa.  
7  
8

9  
10 **Table 2:** Independent predictors of SWE  $\geq$  8 kPa and need for hepatology referral.  
11  
12  
13

14  
15  
16 **Figure legends:**  
17

18  
19 **Figure 1:** Study flow chart  
20  
21

22 **Figure 2:** Classification of NAFLD patients according to using FIB-4 as first step,  
23 then SWE as second step.  
24  
25  
26  
27  
28  
29  
30  
31  
32  
33  
34  
35  
36  
37  
38  
39  
40  
41  
42  
43  
44  
45  
46  
47  
48  
49  
50  
51  
52  
53  
54  
55  
56  
57  
58  
59  
60

Confidential



**Table 1:** NAFLD patient characteristics according to shear wave elastography  $\geq 8$  kPa.

| Characteristic                                      | Total NAFLD cohort<br>N=1,958 | Patients with SWE $\geq$ 8 kPa<br>N=67 (3.4%) | Patients with inconclusive results<br>N=100 (5.1%) | Patients with SWE<8 kPa<br>N=1,791 (91.5%) | P Value* |
|-----------------------------------------------------|-------------------------------|-----------------------------------------------|----------------------------------------------------|--------------------------------------------|----------|
| Age, yrs. (n=1,958)                                 | 55 (45-63)                    | 61 (49-69)                                    | 57 (47-65)                                         | 54 (45-63)                                 | 0.004    |
| Female sex (n=1,958)                                | 53.7% (1,052)                 | 65.7% (44)                                    | 55.0% (55)                                         | 53.2% (953)                                | 0.129    |
| BMI (Kg/Height in meter <sup>2</sup> )<br>(n=1,764) | 32.0 (28.0-36.6)              | 37.2 (31.7-40.8)                              | 40.6 (33.4-47.2)                                   | 31.6 (27.8-35.9)                           | <0.001   |
| Baseline investigations                             |                               |                                               |                                                    |                                            |          |
| ALT, U/L (n=1,944)                                  | 38 (25-60)                    | 37 (21-63)                                    | 31 (20-52)                                         | 38 (25-61)                                 | 0.051    |
| AST, U/L (n=1,273)                                  | 29 (21-42)                    | 36 (23-56)                                    | 27 (19-50)                                         | 29 (21-41)                                 | 0.061    |
| Albumin, g/L (n=1,473)                              | 39 (37-41)                    | 37 (36-39)                                    | 37 (34-39)                                         | 39 (37-41)                                 | <0.001   |
| ALP, U/L (n=1,667)                                  | 77 (64-94)                    | 91 (68-107)                                   | 85 (71-118)                                        | 76 (63-93)                                 | <0.001   |
| GGT, U/L (n=1,627)                                  | 45 (27-87)                    | 87 (36-133)                                   | 48 (29-138)                                        | 45 (27-82)                                 | <0.001   |
| INR (n=875)                                         | 1.0 (1.0-1.1)                 | 1.0 (1.0-1.1)                                 | 1.0 (1.0-1.2)                                      | 1.0 (1.0-1.0)                              | <0.001   |
| Platelets, 10E <sup>9</sup> /L (n=1,922)            | 250 (209-294)                 | 214 (169-255)                                 | 234 (179-295)                                      | 252 (211-295)                              | <0.001   |
| Triglycerides, mmol/L<br>(n=1,830)                  | 1.80 (1.28-2.61)              | 1.79 (1.23-2.37)                              | 1.71 (1.28-2.30)                                   | 1.81 (1.28-2.64)                           | 0.170    |
| Cholesterol, mmol/L<br>(n=1,831)                    | 4.75 (4.01-5.48)              | 4.04 (3.44-4.70)                              | 4.01 (3.42-4.87)                                   | 4.81 (4.10-5.53)                           | <0.001   |
| HDL, mmol/L (n=1,831)                               | 1.16 (0.95-1.39)              | 1.11 (0.90-1.34)                              | 1.10 (0.92-1.31)                                   | 1.16 (0.96-1.39)                           | 0.087    |
| LDL, mmol/L (n=1,831)                               | 2.61 (1.95-3.27)              | 2.07 (1.57-2.55)                              | 2.10 (1.62-2.71)                                   | 2.66 (2.03-3.33)                           | <0.001   |
| Creatinine, mmol/L (n=1,895)                        | 74 (60-87)                    | 67 (51-79)                                    | 66 (54-79)                                         | 74 (61-88)                                 | <0.001   |
| HbA1c, % (n=1,810)                                  | 5.7 (5.5-6.2)                 | 6.2 (5.6-7.2)                                 | 6.1 (5.6-7.1)                                      | 5.7 (5.4-6.2)                              | <0.001   |
| Diabetes mellitus (n=1,958)                         | 28.7% (562)                   | 56.7% (38)                                    | 50.0% (50)                                         | 26.5% (474)                                | <0.001   |
| Glucose intolerance<br>(n=1,958)                    | 33.6% (657)                   | 17.9% (12)                                    | 24.0% (24)                                         | 34.7% (621)                                | 0.002    |
| Hypertension (n=1,958)                              | 40.8% (798)                   | 61.2% (41)                                    | 63.0% (63)                                         | 38.8% (694)                                | <0.001   |
| FIB-4 (n=1,251)                                     | 0.99 (0.69-1.48)              | 1.71 (1.03-2.63)                              | 1.19 (0.77-2.05)                                   | 0.96 (0.68-1.41)                           | <0.001   |

Distribution is expressed as median (interquartile range) or percentage (number).

\* P value refer to comparison between cohort subgroups (3 groups).

SWE, shear wave elastography; BMI, body mass index; ALT, alanine aminotransferase; AST, aspartate aminotransferase; ALP, alkaline phosphatase; GGT, gamma glutamyl transpeptidase; INR, international normalized ration; HDL, high density lipoprotein; LDL, low density lipoprotein; HbA1c, hemoglobin A1c; FIB-4, fibrosis-4 variable index.

**Table 2:** Independent predictors of shear wave elastography  $\geq 8$  kPa and need for hepatology referral.

| Characteristic                  | Predictors of SWE $\geq 8$ kPa |                    | Predictors of inconclusive results or SWE $\geq 8$ kPa |                    |
|---------------------------------|--------------------------------|--------------------|--------------------------------------------------------|--------------------|
|                                 | Odds Ratio (95% CI)            |                    | Odds Ratio (95% CI)                                    |                    |
|                                 | Univariate analysis            | Multivariate model | Univariate analysis                                    | Multivariate model |
| Older patients (age >60 yr)     | 2.05 (1.26-3.34)               | 1.33 (0.75-2.37)   | 1.49 (1.08-2.05)                                       | 0.88 (0.60-1.31)   |
| Female sex                      | 1.68 (1.00-2.80)               | 1.40 (0.80-2.48)   | 1.28 (0.93-1.77)*                                      | 1.14 (0.79-1.64)   |
| Elevated ALT or AST at baseline | 1.61 (0.97-2.68)               | NS                 | 0.96 (0.70-1.32)                                       | NS                 |
| Obesity (BMI >30)               | 2.11 (1.10-4.04)               | 1.93 (1.01-3.73)   | 3.19 (2.02-5.06)                                       | 2.94 (1.85-4.69)   |
| Diabetes mellitus type 2        | 3.42 (2.09-5.60)               | 2.22 (1.13-4.36)   | 3.10 (2.24-4.27)                                       | 2.33 (1.50-3.63)   |
| Impaired fasting glucose        | 0.42 (0.22-0.79)               | 0.75 (0.33-1.67)   | 0.52 (0.35-0.76)                                       | 0.91 (0.55-1.49)   |
| Hypertension                    | 2.36 (1.43-3.89)               | 2.18 (1.19-3.98)   | 2.61 (1.88-3.62)                                       | 2.38 (1.62-3.50)   |

BMI, body mass index; ALT, alanine aminotransferase; AST, aspartate aminotransferase; SWE, shear wave elastography; NS, not significant in univariate analysis.

\* We adjusted for age and sex in our multivariate models even if either variable was not significant in univariate models.

1  
2  
3  
4  
5  
6  
7  
8  
9  
10  
11  
12  
13  
14  
15  
16  
17  
18  
19  
20  
21  
22  
23  
24  
25  
26  
27  
28  
29  
30  
31  
32  
33  
34  
35  
36  
37  
38  
39  
40  
41  
42  
43  
44  
45  
46  
47  
48  
49  
50  
51  
52  
53  
54  
55  
56  
57  
58  
59  
60

Figure 1: Study flow chart

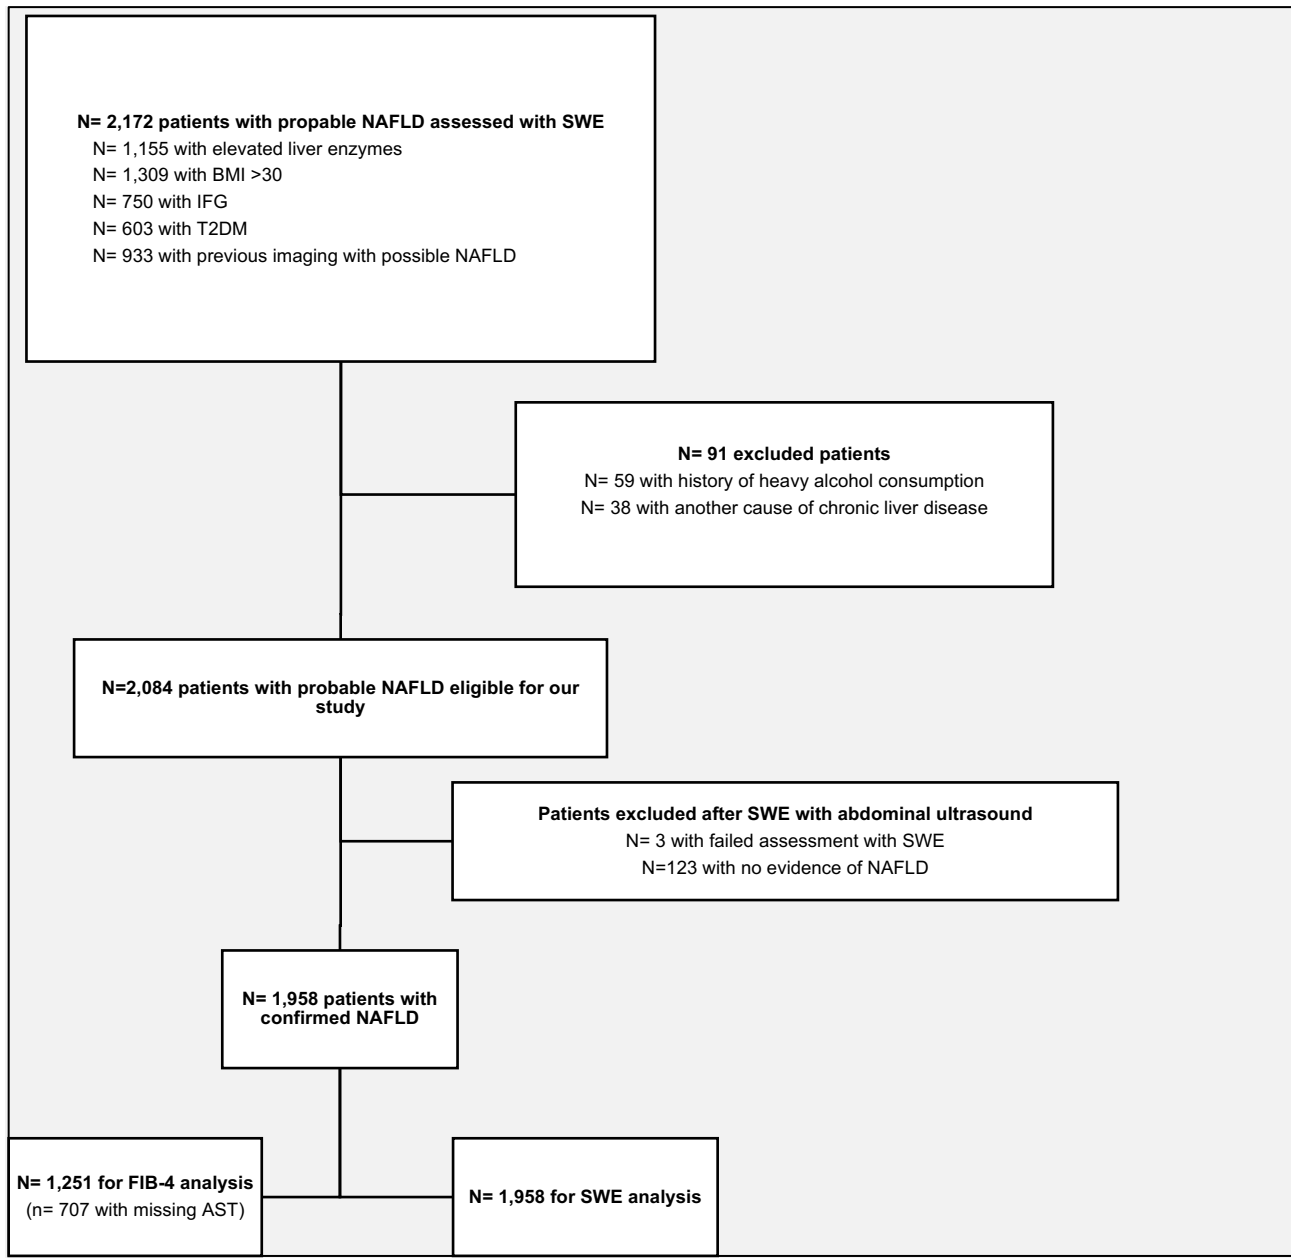

SWE, shear wave elastography; BMI, body mass index; IFG, impaired fasting glucose; T2DM, type 2 diabetes mellites; FIB-4, fibrosis-4 variable index.

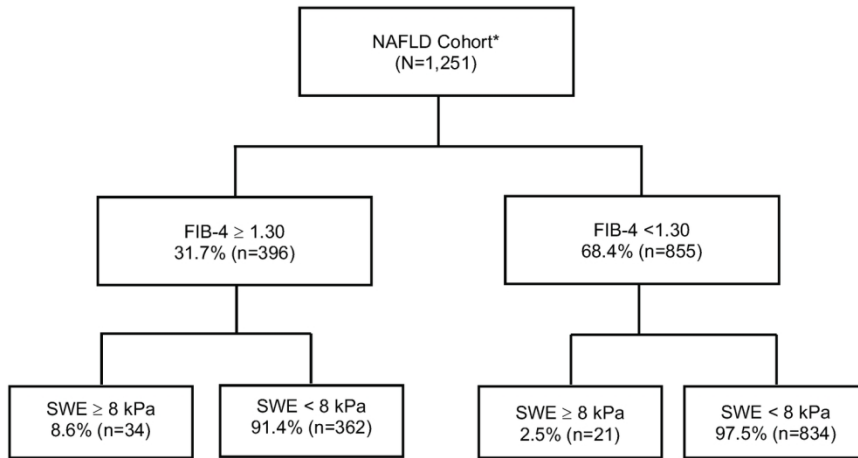

\* Only 1251 NAFLD patients had data to calculate FIB-4 at baseline  
FIB-4, fibrosis-4 variable index; SWE, shear wave elastography.

Figure 2

152x102mm (300 x 300 DPI)

**Supplement Table 1:** Performance of using different cut-offs of Shearwave Elastography (SWE) in classifying NAFLD patients (n=1,958)

| SWE cutoff | Number and (percentage) of patients at or above cut-off | Number and (percentage) of patients below cut-off |
|------------|---------------------------------------------------------|---------------------------------------------------|
| 6.0 kPa    | 271 (13.8%)                                             | 1,687 (86.2%)                                     |
| 6.5 kPa    | 165 (8.4%)                                              | 1,793 (91.6%)                                     |
| 7.0 kPa    | 106 (5.4%)                                              | 1,852 (94.6%)                                     |
| 7.5 kPa    | 80 (4.1%)                                               | 1,878 (95.9%)                                     |
| 8.0 kPa    | 67 (3.4%)                                               | 1,891 (96.6%)                                     |
| 8.5 kPa    | 54 (2.8%)                                               | 1,904 (97.2%)                                     |
| 9.0 kPa    | 44 (2.3%)                                               | 1,914 (97.8%)                                     |

\* There were 100 patients with inconclusive results.

**Supplement Table 2: NAFLD Patients characteristics according to FIB-4 availability**

| Characteristic                         | Patients with available FIB-4<br>N=1,251 (63.9%) | Patients without FIB-4<br>N=707 (36.1%) | P Value |
|----------------------------------------|--------------------------------------------------|-----------------------------------------|---------|
| Age, yrs.                              | 54 (44-63)                                       | 55 (46-63)                              | 0.21    |
| Female sex                             | 54.3% (679)                                      | 52.8% (373)                             | 0.52    |
| BMI (Kg/Height in meter <sup>2</sup> ) | 31.9 (27.8-36.4)                                 | 32.4 (28.4-36.8)                        | 0.15    |
| A1C at baseline, %                     | 5.7 (5.4-6.3)                                    | 5.7 (5.5-6.2)                           | 0.78    |
| Diabetes mellitus                      | 29.1% (364)                                      | 28.0% (198)                             | 0.61    |
| Glucose intolerance                    | 32.1% (401)                                      | 36.2% (256)                             | 0.06    |
| Hypertension                           | 42.1% (527)                                      | 38.3% (271)                             | 0.10    |

Distribution is expressed as median (interquartile range) or percentage (number).  
 FIB-4, fibrosis-4 variable index; BMI, body mass index; HbA1c, hemoglobin A1c.

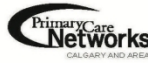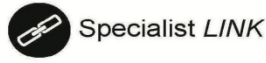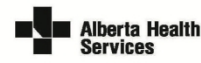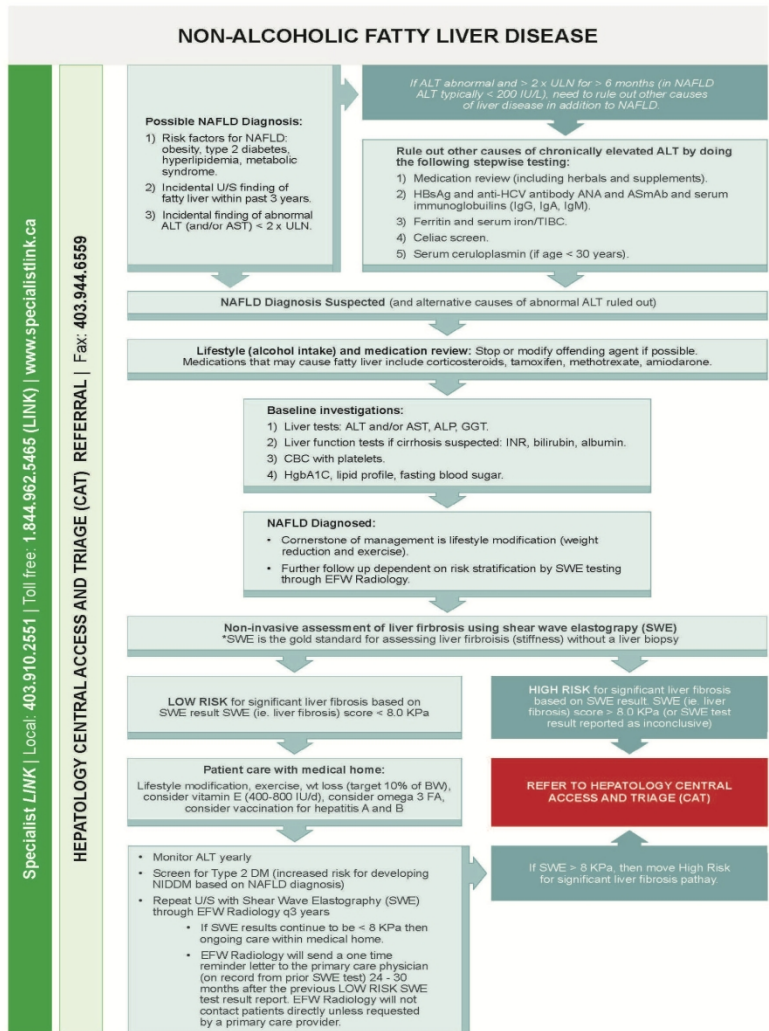

Supplement: 2020-0009-original-submission.pdf [file 2020-0009-original-submission.pdf]
